# Supplementary material for: MELD, MELD 3.0, versus Child score to predict mortality after acute variceal hemorrhage: A multicenter US cohort
Source: PubMed Central journal article supplement — Hepatol Commun. 2023 Sep 11;7(10):e0258. doi: 10.1097/HC9.0000000000000258 (PMC10497247; doi:10.1097/hc9.0000000000000258), 2023-09-11

**Supplemental Digital Content for**

**Title: MELD, MELD 3.0, versus Child Score to predict mortality after acute variceal hemorrhage: a multi-center U.S. cohort**

Adam Buckholz MD MS<sup>1\*</sup>, Rochelle Wong MD<sup>2\*</sup>

**SDC, Figure 1**

**Supplemental Figure 1.** Calibration of aMELD in validation and full cohort. In both cases it is significantly miscalibrated.

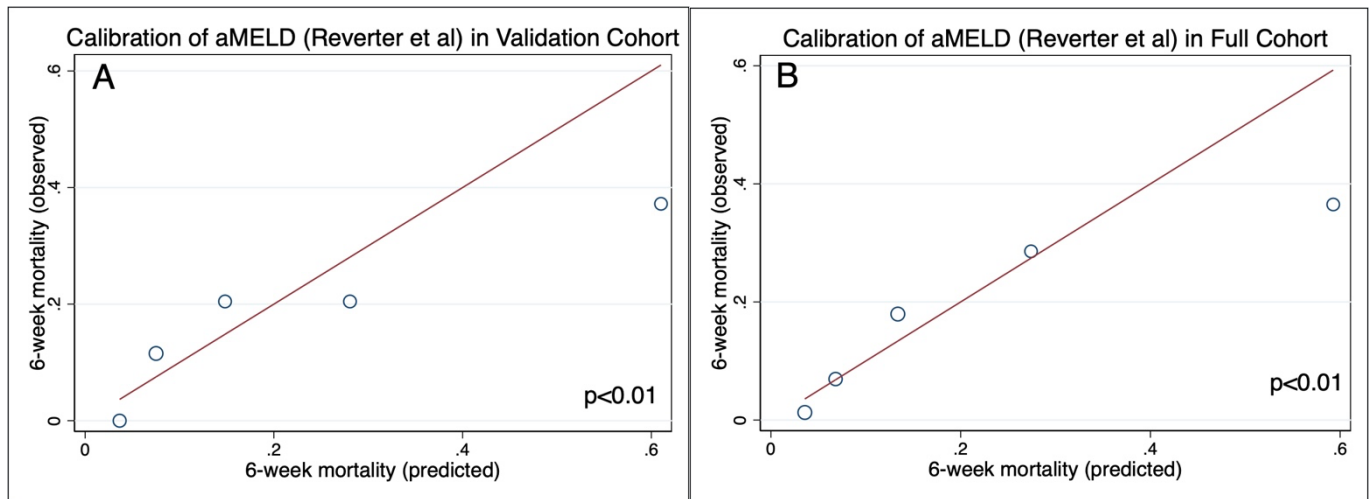

Supplement: hc9-7-e0258-s001.pdf [file hc9-7-e0258-s001.pdf]
